# Supplementary material for: A Comparative Study between the Three Waves of the Pandemic on the Prevalence of Oropharyngeal Dysphagia and Malnutrition among Hospitalized Patients with COVID-19
Source: MDPI journal article supplement (doi:10.3390/nu14183826), 2022-09-16
Supplement: s1 [file s1]

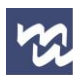

## Post-COVID-19 recovery diet

### ➤ GENERAL RECOMMENDATIONS

- Temporarily, and until they recover their usual mobility (muscle mass and strength), it is necessary to follow a diet richer in protein (dairy products, meat, fish, eggs, pulses).
- It is also important to maintain or start rehabilitation exercises to regain muscle mass.
- It would not be optimal to lose more weight. It is therefore advisable to weigh yourself every week to monitor your progress. In case of weight loss, contact the dietician-nutritionists (phone number - extension XXXX).

### ➤ DIETARY RECOMMENDATIONS

| MEAL        | FOODS                                                                                                  |
|-------------|--------------------------------------------------------------------------------------------------------|
| BREAKFAST   | Dairy product / soya drink + bread + tuna / omelette / boiled ham                                      |
| MID-MORNING | 1 high-protein yoghurt* + 1 fruit                                                                      |
| LUNCH       | Pasta / rice / pulses (3-4 times a week) / potato<br>Meat / fish / eggs<br>Vegetables / salad<br>Fruit |
| SNACK       | 1 high-protein yoghurt* or cottage cheese + 1 fruit                                                    |
| DINNER      | Vegetables / salad<br>Pasta / rice / potato<br>Meat / fish / eggs<br>Fruit                             |
| SNACK       | 1 glass of milk/soy drink<br>If protein intake is low, add 2 tablespoons of skimmed milk powder**.     |

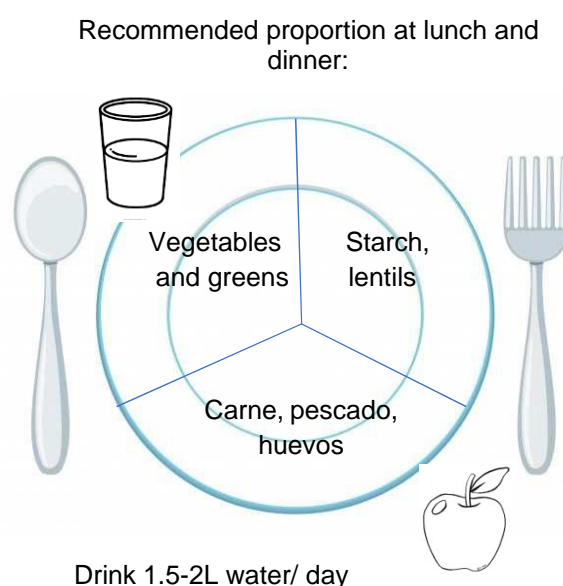

\*High-protein yoghurt sold in supermarkets: yoghurts with a protein content of more than 10g/100g of food, e.g. Skyr (LIDL), Yo-Pro (Danone), + Proteins (Mercadona)...

\*\*Skimmed milk powder sold in supermarkets.

Eliminate or limit the following foods to occasional consumption and moderate amounts:

- **SAUSAGES and SWEETS:** *smoked sausage, salami... and pastries, industrial and homemade pastries...*
- **SUGARED DRINKS and ALCOHOLIC BEVERAGES:** *soft drinks, fruit juices, wine, beer...*

**In order to ensure protein intake and use, in addition to the recommended protein intake, it is possible to:**

Immediately after the rehabilitation exercises, take an extra protein intake: a high-protein yoghurt, milk enriched with milk powder, cottage cheese, tuna sandwich.

If you find it difficult to chew and/or swallow meat and fish, you can eat it in minced form or in soft preparations such as cannelloni, meat pies, puddings, omelettes...
